# Supplementary material for: Ganglioside Composition Distinguishes Anaplastic Ganglioglioma Tumor Tissue from Peritumoral Brain Tissue: Complementary Mass Spectrometry and Thin-Layer Chromatography Evidence
Source: MDPI journal article supplement (doi:10.3390/ijms22168844), 2021-08-17
Supplement: s1 [file s1]

**Table S2.** Negatively charged molecular ions corresponding to ganglioside species detected by MS analysis of native ganglioside mixture isolated from peritumoral tissue (PT).

| <i>m/z</i>                         |                                    |                                  | Molecular species of GG                     | Ion intensity |          |
|------------------------------------|------------------------------------|----------------------------------|---------------------------------------------|---------------|----------|
| [M-3H <sup>+</sup> ] <sup>3-</sup> | [M-2H <sup>+</sup> ] <sup>2-</sup> | [M-H <sup>+</sup> ] <sup>-</sup> | Peritumoral Tissue (PT)                     | Sum           | % of max |
|                                    |                                    | 1151.79                          | GM3 (d18:1/16:0)                            | 8130          | 1.38     |
|                                    |                                    | 1179.82                          | GM3 (d18:1/18:0)                            | 31843         | 5.41     |
|                                    |                                    | 1207.80                          | GM3 (d20:1/18:0) and/or (d18:1/20:0)        | 13720         | 2.33     |
|                                    |                                    | 1233.83                          | GM3 (d18:1/22:1)                            | 9090          | 1.54     |
|                                    |                                    | 1261.92                          | GM3 (d18:1/24:1)                            | 11310         | 1.92     |
|                                    |                                    | 1380.77                          | GM2 (d18:1/18:1)                            | 7132          | 1.21     |
|                                    |                                    | 1382.82                          | GM2 (d18:1/18:0)                            | 44960         | 7.64     |
|                                    |                                    | 1410.85                          | GM2 (d20:1/18:0) and/or (d18:1/20:0)        | 17844         | 3.03     |
|                                    |                                    | 1464.95                          | GD3 (d18:1/16:0) <sup>Na</sup>              | 3543          | 0.60     |
|                                    | 734.92                             | 1470.80                          | GD3 (d18:1/18:0)                            | 46101         | 7.83     |
|                                    | 748.88                             | 1498.86                          | GD3 (d20:1/18:0) and/or (d18:1/20:0)        | 4794          | 0.81     |
|                                    | 761.88                             | 1524.77                          | GD3 (d18:1/22:1)                            | 20014         | 3.40     |
|                                    | 762.90                             | 1526.81                          | GD3 (d18:1/22:0)                            | 16062         | 2.73     |
|                                    | 757.87                             | 1516.80                          | GM1(d18:1/16:0)                             | 8870          | 1.51     |
|                                    | 771.94                             | 1544.85                          | GM1(d18:1/18:0)                             | 266812        | 45.33    |
|                                    |                                    | 1572.87                          | GM1 (d20:1/18:0) and/or (d18:1/20:0)        | 157918        | 26.83    |
|                                    |                                    | 1600.93                          | GM1 (d18:1/22:0)                            | 10241         | 1.74     |
|                                    | 804.77                             | 1610.54                          | GM1 (d18:1/24:0)-H <sub>2</sub> O           | 21375         | 3.63     |
|                                    |                                    | 1626.97                          | GM1 (d18:1/24:1)                            | 4699          | 0.80     |
|                                    |                                    | 1629.00                          | GM1 (d18:1/24:0)                            | 3923          | 0.67     |
|                                    | 836.45                             | 1673.91                          | GD2 (d18:1/18:0)                            | 106295        | 18.06    |
|                                    | 850.47                             | 1701.94                          | GD2 (d20:1/18:0) and/or (d18:1/20:0)        | 22956         | 3.90     |
|                                    | 917.49                             | 1835.96                          | GD1 (d18:1/18:0)                            | 588627        | 100.00   |
|                                    | 931.47                             | 1863.99                          | GD1 (d20:1/18:0) and/or (d18:1/20:0)        | 568515        | 96.58    |
|                                    | 938.47                             | 1877.95                          | O-Ac-GD1 (d18:1/18:0)                       | 26977         | 4.58     |
|                                    | 945.49                             | 1892.03                          | GD1 (d18:1/22:0)                            | 55251         | 9.39     |
|                                    | 949.46                             | 1899.94                          | GD1 (d18:1/24:1)-H <sub>2</sub> O           | 35150         | 5.97     |
|                                    | 952.44                             | 1906.04                          | O-Ac-GD1 (d20:1/18:0)                       | 36533         | 6.21     |
|                                    | 958.50                             | 1918.04                          | GD1(d18:1/24:1)                             | 22169         | 3.77     |
|                                    | 959.50                             | 1920.00                          | GD1 (d18:1/24:0)                            | 23151         | 3.93     |
|                                    | 966.43                             | 1933.87                          | O-Ac-GD1 (d18:1/22:0)                       | 35192         | 5.98     |
|                                    | 980.93                             | 1961.87                          | O-Ac-GD1 (d18:1/24:0)                       | 47368         | 8.05     |
|                                    | 999.45                             | 1999.91                          | Hex-GD1 (d18:0/18:0)                        | 10205         | 1.73     |
|                                    | 1018.97                            | 2039.04                          | HexNAc-GD1 (d18:1/18:0)                     | 15156         | 2.57     |
|                                    | 1033.03                            | 2067.07                          | HexNAc-GD1 (d20:1/18:0) and/or (d18:1/20:0) | 12487         | 2.12     |
|                                    | 1039.47                            | 2080.09                          | Hex-GD1 (d18:1/24:1)                        | 12776         | 2.17     |
|                                    | 1053.51                            | 2108.02                          | Hex-GD1 (d20:1/24:1)                        | 11491         | 1.95     |
| 708.35                             | 1063.51                            | 2127.06                          | GT1 (d18:1/18:0)                            | 157625        | 26.78    |
| 717.69                             | 1077.54                            | 2155.09                          | GT1 (d20:1/18:0) and/or (d18:1/20:0)        | 165248        | 28.07    |
|                                    | 1084.03                            | 2169.07                          | O-Ac-GT1 (d18:1/18:0)                       | 20515         | 3.49     |

|        |         |         |                                           |       |      |
|--------|---------|---------|-------------------------------------------|-------|------|
| 726.97 | 1091.00 | 2183.12 | GT1 (d18:1/22:0)                          | 20852 | 3.54 |
| 731.64 | 1098.03 | 2197.13 | O-Ac-GT1 (d20:1/18:0) and/or (d18:1/20:0) | 26720 | 4.54 |
|        | 1103.04 | 2207.07 | GT1 (d18:2/24:1)                          | 12564 | 2.13 |
|        | 1112.00 | 2225.01 | O-Ac-GT1 (d18:1/22:0)                     | 10196 | 1.73 |
|        | 1125.98 | 2252.91 | Fuc-GT1 (d18:1/18:0)-H <sub>2</sub> O     | 11782 | 2.00 |
|        | 1135.93 | 2272.86 | Fuc-GT1 (d18:1/18:0)                      | 12368 | 2.10 |
