# Supplementary material for: Ganglioside Composition Distinguishes Anaplastic Ganglioglioma Tumor Tissue from Peritumoral Brain Tissue: Complementary Mass Spectrometry and Thin-Layer Chromatography Evidence
Source: MDPI journal article supplement (doi:10.3390/ijms22168844), 2021-08-17
Supplement: s1 [file s1]

**Table S1.** Negatively charged molecular ions corresponding to ganglioside species detected by MS analysis of native ganglioside mixture isolated from anaplastic ganglioglioma (AGGL) tumor tissue.

| <b>m/z</b>                             |                                      | <b>Gangliosides Molecular species</b>         | <b>Ion intensity</b> |                 |
|----------------------------------------|--------------------------------------|-----------------------------------------------|----------------------|-----------------|
| <b>[M-2H<sup>+</sup>]<sup>2-</sup></b> | <b>[M-H<sup>+</sup>]<sup>-</sup></b> | <b>Anaplastic Ganglioglioma (AGGL)</b>        | <b>Sum</b>           | <b>% of max</b> |
|                                        | 1151.79                              | GM3 (d18:1/16:0)                              | 62987                | 29.11           |
|                                        | 1179.81                              | GM3 (d18:1/18:0)                              | 45474                | 21.02           |
|                                        | 1207.83                              | GM3 (d20:1/18:0) and/or (d18:1/20:0)          | 19929                | 9.21            |
|                                        | 1233.83                              | GM3 (d18:1/22:1)                              | 14883                | 6.88            |
|                                        | 1235.81                              | GM3 (d18:1/22:0)                              | 40281                | 18.62           |
|                                        | 1249.87                              | GM3 (d18:1/23:0)                              | 16849                | 7.79            |
|                                        | 1261.88                              | GM3 (d18:1/24:1)                              | 46906                | 21.68           |
|                                        | 1263.94                              | GM3 (d18:1/24:0)                              | 46396                | 21.44           |
|                                        | 1354.79                              | GM2 (d18:1/16:0)                              | 7159                 | 3.31            |
|                                        | 1382.82                              | GM2 (d18:1/18:0)                              | 7971                 | 3.68            |
| 720.90                                 | 1442.81                              | GD3 (d18:1/16:0)                              | 98569                | 45.55           |
| 727.84                                 | 1456.68                              | GD3 (d18:1/17:0)                              | 6110                 | 2.82            |
| 733.90                                 | 1468.82                              | GD3 (d18:1/18:1)                              | 10733                | 4.96            |
| 734.92                                 | 1470.84                              | GD3 (d18:1/18:0)                              | 111963               | 51.74           |
| 741.88                                 | 1484.81                              | O-Ac-GD3 (d18:1/16:0)                         | 5149                 | 2.38            |
| 748.93                                 | 1498.86                              | GD3 (d20:1/18:0) and/or (d18:1/20:0)          | 54121                | 25.01           |
| 761.88                                 | 1524.77                              | GD3 (d18:1/22:1)                              | 9121                 | 4.22            |
| 762.95                                 | 1526.90                              | GD3 (d18:1/22:0)                              | 144088               | 66.59           |
| 769.88                                 | 1540.87                              | GD3 (d18:1/23:0) and/or O-Ac-GD3 (d20:1/18:0) | 45265                | 20.92           |
| 775.95                                 | 1552.82                              | GD3 (d18:1/24:1)                              | 142676               | 65.94           |
| 776.91                                 | 1554.93                              | GD3 (d18:1/24:0)                              | 216383               | 100.00          |
| 757.87                                 | 1516.84                              | GM1 (d18:1/16:0)                              | 9307                 | 4.30            |
| 771.93                                 | 1544.86                              | GM1 (d18:1/18:0)                              | 12390                | 5.73            |
|                                        | 1572.90                              | GM1 (d20:1/18:0) and/or (d18:1/20:0)          | 10309                | 4.76            |
|                                        | 1626.97                              | GM1 (d18:1/24:1)                              | 9546                 | 4.41            |
| 822.69                                 | 1645.89                              | GD2 (d18:1/16:0)                              | 15666                | 7.24            |
| 836.45                                 | 1673.91                              | GD2 (d18:1/18:0)                              | 54837                | 25.34           |
| 850.50                                 | 1701.94                              | GD2 (d20:1/18:0) and/or (d18:1/20:0)          | 14010                | 6.47            |
| 864.48                                 | 1729.97                              | GD2 (d18:1/22:0)                              | 25158                | 11.63           |
| 877.61                                 | 1756.23                              | GD2 (d18:1/24:1)                              | 27520                | 12.72           |
| 878.62                                 | 1758.25                              | GD2 (d18:1/24:0)                              | 30589                | 14.14           |
| 917.51                                 | 1835.96                              | GD1 (d18:1/18:0)                              | 57375                | 26.52           |
| 931.49                                 | 1863.99                              | GD1 (d20:1/18:0) and/or (d18:1/20:0)          | 46369                | 21.43           |
| 945.49                                 | 1892.03                              | GD1 (d18:1/22:0)                              | 29181                | 13.49           |
| 952.50                                 | 1906.01                              | GD1 (d18:1/23:0)                              | 18047                | 8.34            |
| 958.50                                 | 1918.04                              | GD1 (d18:1/24:1)                              | 30484                | 14.09           |
| 959.50                                 | 1920.00                              | GD1 (d18:1/24:0)                              | 42879                | 19.82           |
| 976.50                                 | 1954.01                              | Fuc-GD1 (d18:1/16:0)                          | 11000                | 5.08            |
| 1033.03                                | 2067.07                              | HexNAc-GD1 (d20:1/18:0) and/or (d18:1/20:0)   | 12187                | 5.63            |
| 1049.00                                | 2099.01                              | GT1 (d18:1/16:0)                              | 11251                | 5.20            |
| 1063.52                                | 2127.06                              | GT1 (d18:1/18:0)                              | 22154                | 10.24           |
| 1077.05                                | 2155.09                              | GT1 (d20:1/18:0) and/or (d18:1/20:0)          | 17381                | 8.03            |
| 1091.57                                | 2183.12                              | GT1 (d18:1/22:0)                              | 17655                | 8.16            |
| 1098.03                                | 2197.13                              | GT1 (d18:1/23:0)                              | 11252                | 5.20            |
| 1104.03                                | 2209.08                              | GT1 (d18:1/24:1)                              | 30179                | 13.95           |
| 1105.09                                | 2211.08                              | GT1 (d18:1/24:0)                              | 43062                | 19.90           |
