# Supplementary material for: Ganglioside Composition Distinguishes Anaplastic Ganglioglioma Tumor Tissue from Peritumoral Brain Tissue: Complementary Mass Spectrometry and Thin-Layer Chromatography Evidence
Source: MDPI journal article supplement (doi:10.3390/ijms22168844), 2021-08-17
Supplement: s1 [file s1]

**Table S3.** Negatively charged molecular ions corresponding to ganglioside species detected by MS analysis of native ganglioside mixture isolated from normal brain (NB) tissue.

| <i>m/z</i>                         |                                    |                                  | Gangliosides Molecular species              | Ion intensity |          |
|------------------------------------|------------------------------------|----------------------------------|---------------------------------------------|---------------|----------|
| [M-3H <sup>+</sup> ] <sup>3-</sup> | [M-2H <sup>+</sup> ] <sup>2-</sup> | [M-H <sup>+</sup> ] <sup>-</sup> | Normal Brain (NB)                           | Sum           | % of max |
|                                    |                                    | 1179.76                          | GM3 (d18:1/18:0)                            | 85175         | 6.18     |
|                                    |                                    | 1207.78                          | GM3 (d20:1/18:0) and/or (d18:1/20:0)        | 48207         | 3.50     |
|                                    |                                    | 1235.80                          | GM3 (d18:1/22:0)                            | 21817         | 1.58     |
|                                    |                                    | 1261.88                          | GM3 (d18:1/24:1)                            | 21442         | 1.56     |
|                                    |                                    | 1382.82                          | GM2 (d18:1/18:0)                            | 84052         | 6.10     |
|                                    |                                    | 1410.85                          | GM2 (d20:1/18:0) and/or (d18:1/20:0)        | 74681         | 5.42     |
|                                    | 734.86                             | 1470.99                          | GD3 (d18:1/18:0)                            | 207758        | 15.08    |
|                                    | 748.88                             | 1498.86                          | GD3 (d20:1/18:0) and/or (d18:1/20:0)        | 96730         | 7.02     |
|                                    | 755.92                             | 1512.84                          | O-Ac-GD3 (d18:1/18:0)                       | 19577         | 1.42     |
|                                    | 762.94                             | 1526.89                          | GD3 (d18:1/22:0)                            | 32648         | 2.37     |
|                                    | 776.92                             | 1554.85                          | GD3 (d18:1/24:0)                            | 20364         | 1.48     |
|                                    | 757.87                             | 1516.84                          | GM1 (d18:1/16:0)                            | 14890         | 1.08     |
|                                    |                                    | 1542.92                          | GM1 (d18:1/18:1)                            | 22947         | 1.67     |
|                                    | 771.93                             | 1544.84                          | GM1 (d18:1/18:0)                            | 273674        | 19.87    |
|                                    |                                    | 1572.84                          | GM1 (d20:1/18:0) and/or (d18:1/20:0)        | 422754        | 30.69    |
|                                    |                                    | 1600.93                          | GM1 (d18:1/22:0)                            | 35281         | 2.56     |
|                                    | 836.45                             | 1673.91                          | GD2 (d18:1/18:0)                            | 153462        | 11.14    |
|                                    | 850.47                             | 1701.94                          | GD2 (d20:1/18:0) and/or (d18:1/20:0)        | 188951        | 13.72    |
|                                    | 917.63                             | 1835.96                          | GD1 (d18:1/18:0)                            | 685055        | 49.74    |
|                                    | 924.47                             | 1849.94                          | O-Ac-GD1 (d18:1/16:0)                       | 32134         | 2.33     |
|                                    | 931.65                             | 1863.99                          | GD1 (d20:1/18:0) and/or (d18:1/20:0)        | 1377407       | 100.00   |
|                                    | 938.47                             | 1877.95                          | O-Ac-GD1 (d18:1/18:0)                       | 39710         | 2.88     |
|                                    | 945.49                             | 1892.03                          | GD1 (d18:1/22:0)                            | 131090        | 9.52     |
|                                    | 949.46                             | 1899.94                          | GD1 (d18:1/24:1)-H <sub>2</sub> O           | 42470         | 3.08     |
|                                    |                                    | 1901.94                          | GD1 (d18:1/24:0)-H <sub>2</sub> O           | 9664          | 0.70     |
|                                    | 952.44                             | 1906.04                          | O-Ac-GD1 (d20:1/18:0) and/or (d18:1/20:0)   | 69850         | 5.07     |
|                                    | 958.50                             | 1918.04                          | GD1 (d18:1/24:1)                            | 65526         | 4.76     |
|                                    | 959.50                             | 1920.00                          | GD1 (d18:1/24:0)                            | 43911         | 3.19     |
|                                    | 960.48                             | 1921.96                          | GD1 (d18:0/24:0)                            | 43337         | 3.15     |
|                                    | 965.55                             | 1932.18                          | GD1 (d20:1/24:1)                            | 37256         | 2.70     |
|                                    | 972.51                             | 1946.00                          | O-Ac-GD1 (d18:1/22:1)                       | 23557         | 1.71     |
|                                    | 1019.02                            | 2039.04                          | HexNAc-GD1 (d18:1/18:0)                     | 15718         | 1.14     |
|                                    | 1033.03                            | 2067.07                          | HexNAc-GD1 (d20:1/18:0) and/or (d18:1/20:0) | 17322         | 1.26     |
|                                    | 1114.00                            | 2229.01                          | Hex-HexNAc-GD1 (d20:1/18:0)                 | 41820         | 3.04     |
| 708.35                             | 1063.53                            | 2127.06                          | GT1 (d18:1/18:0)                            | 154444        | 11.21    |
| 717.66                             | 1077.54                            | 2155.09                          | GT1 (d20:1/18:0) and/or (d18:1/20:0)        | 371410        | 26.96    |
|                                    | 1081.98                            | 2165.00                          | GT1 (d18:1/22:0)-H <sub>2</sub> O           | 37383         | 2.71     |
|                                    | 1084.03                            | 2169.07                          | O-Ac-GT1 (d18:1/18:0)                       | 23802         | 1.73     |
| 726.97                             | 1091.00                            | 2183.12                          | GT1 (d18:1/22:0)                            | 74153         | 5.38     |
|                                    | 1096.01                            | 2193.03                          | GT1 (d18:1/24:0)-H <sub>2</sub> O           | 34306         | 2.49     |
| 731.64                             | 1098.54                            | 2197.13                          | O-Ac-GT1 (d20:1/18:0)                       | 54944         | 3.99     |
|                                    | 1103.04                            | 2207.07                          | GT1 (d18:1/24:2)                            | 86272         | 6.26     |
|                                    | 1104.03                            | 2209.08                          | GT1 (d18:1/24:1)                            | 48870         | 3.55     |
|                                    | 1108.97                            | 2218.97                          | GT1 (d20:1/24:1)-H <sub>2</sub> O           | 18890         | 1.37     |
