# Supplementary material for: Ganglioside Composition Distinguishes Anaplastic Ganglioglioma Tumor Tissue from Peritumoral Brain Tissue: Complementary Mass Spectrometry and Thin-Layer Chromatography Evidence
Source: Int J Mol Sci. 2021 Aug 17;22(16):8844. doi: 10.3390/ijms22168844 (PMC8396361; doi:10.3390/ijms22168844)
Supplement: Supplementary file 1 [file ijms-22-08844-s001.zip]

Archive with 4 entries (4 files):
- Supplement_Figure S1. MS1 screening (AGGL, PT, NB)_fin.pdf
- Supplement_Table S1. AGGL (MS1 ion list)_fin.pdf
- Supplement_Table S2. PT (MS1 ion list)_fin.pdf
- Supplement_Table S3. NB (MS1 ion list)_fin.pdf
